# Supplementary material for: Critical advances for the iron molten air battery: a new lowest temperature, rechargeable, ternary electrolyte domain
Source: Royal Society of Chemistry journal article supplement (doi:10.1039/c5ta06069a), 2015-01-01
Supplement: c5ta06069a1.pdf [file c5ta06069a1.pdf]

## Electronic Supplementary Information

### Critical Advances for the Iron Molten Air Battery: A New Lowest Temperature, Rechargeable, Ternary Electrolyte Domain

Shuzhi Liu,<sup>ab</sup> Xin Li,<sup>ab</sup> Baochen Cui,<sup>\*ab</sup> Xianjun Liu,<sup>ab</sup> Yulan Hao,<sup>ab</sup> Qi Guo,<sup>ab</sup> Peiqiang Xu<sup>a,b</sup> and Stuart Licht<sup>\*c</sup>

<sup>a</sup>*College of Chemistry and Chemical Engineering, Northeast Petroleum University, Daqing 163318, China*

<sup>b</sup>*Province Key Laboratory of Oil and Natural Gas Chemical Industry, Northeast Petroleum University, Daqing 163318, China*

<sup>c</sup>*Department of Chemistry, George Washington University, Washington DC 20052, USA*

*\*Corresponding author: E-mail: cuibaochen2005@163.com*

*E-mail: slicht@gwu.edu*

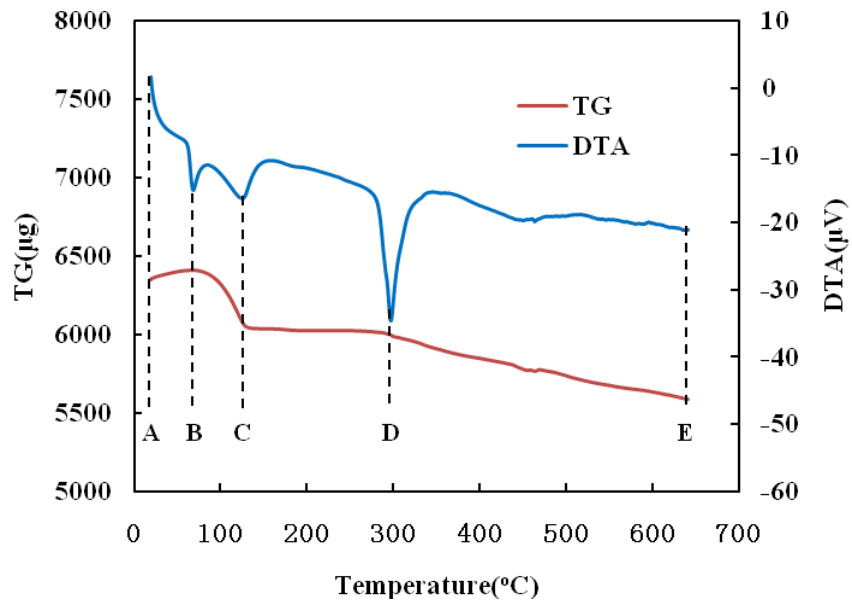

**Fig.S1** TG/DTA of  $\text{Fe}_2\text{O}_3$  and NaOH mix for confirmation of the reaction of  $\text{Fe}_2\text{O}_3$  with molten NaOH to form  $\text{H}_2\text{O}$  and  $\text{NaFeO}_2$ .

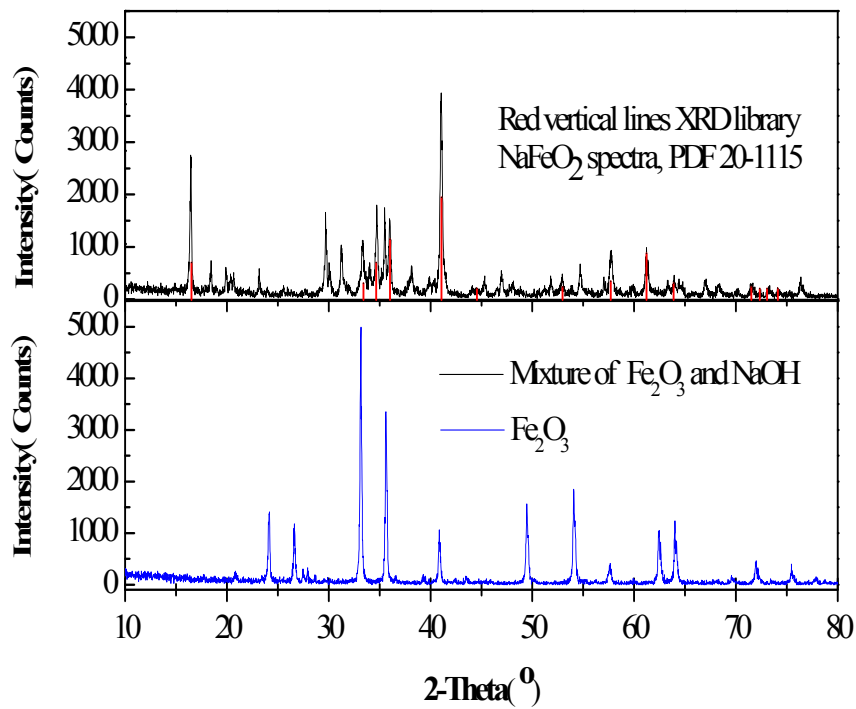

**Fig.S2** XRD analysis of  $\text{Fe}_2\text{O}_3$  and NaOH mix and pure  $\text{Fe}_2\text{O}_3$ . XRD analysis is conducted at a sweep rate of 0.2 degree per minute on a Rigaku D/MAX-2200 diffractometer and analyzed with the Jade software package (MDI Jade 5.0, Materials Data, Inc.).
